operating characteristic curve should remain constant or increase with the threshold, which was not the case in the study by Biaï *et al.*<sup>1</sup> For all of these reasons, we strongly suspect that some recruitment biases could have occurred.

Finally, some studies have previously evaluated the diagnostic accuracy of a transient positive end-expiratory pressure elevation, identified as a recruitment maneuver, to diagnose preload responsiveness. Such diagnostic approaches were similar to those proposed by the authors and should have been discussed.<sup>6–8</sup> Diagnostic studies are at a high risk for biases,<sup>9</sup> and the methodologic considerations above highlight a risk of bias in the study by Biaï *et al.*<sup>1</sup>

### Competing Interests

The authors declare no competing interests.

**Matthias Jacquet-Lagrèze, M.D., Guillaume Izaute, M.D., Jean-Luc Fellahi, M.D., Ph.D.** Hôpital Louis Pradel, Hospices Civils de Lyon, Lyon, France (M.J.-L.). matthias.jl@gmail.com

### References

1. Biaï M, Lanchon R, Sesay M, Le Gall L, Pereira B, Futier E, Nouette-Gaulain K: Changes in stroke volume induced by lung recruitment maneuver predict fluid responsiveness in mechanically ventilated patients in the operating room. *ANESTHESIOLOGY* 2017; 126:260–7
2. Bossuyt PM, Reitsma JB, Bruns DE, Gatsonis CA, Glasziou PP, Irwig LM, Lijmer JG, Moher D, Rennie D, de Vet HC; Standards for Reporting of Diagnostic Accuracy: Towards complete and accurate reporting of studies of diagnostic accuracy: The STARD initiative. *BMJ* 2003; 326:41–4
3. Bossuyt PM, Reitsma JB, Bruns DE, Gatsonis CA, Glasziou PP, Irwig L, Lijmer JG, Moher D, Rennie D, Vet HCW de, Kressel HA, Rifai N, Golub RM, Altman DG, Hooft L, Korevaar DA, Cohen JF: STARD 2015: An updated list of essential items for reporting diagnostic accuracy studies. *BMJ* 2015; 351:h5527
4. Monnet X, Persichini R, Ktari M, Jozwiak M, Richard C, Teboul JL: Precision of the transpulmonary thermomodulation measurements. *Crit Care* 2011; 15:R204
5. Cannesson M, Le Manach Y, Hofer CK, Goarin JP, Lehot JJ, Vallet B, Tavernier B: Assessing the diagnostic accuracy of pulse pressure variations for the prediction of fluid responsiveness: A “gray zone” approach. *ANESTHESIOLOGY* 2011; 115:231–41
6. Wilkman E, Kuitunen A, Pettilä V, Varpula M: Fluid responsiveness predicted by elevation of PEEP in patients with septic shock. *Acta Anaesthesiol Scand* 2014; 58:27–35
7. Tusman G, Groisman I, Maidana GA, Scandurra A, Arca JM, Böhm SH, Suarez-Sipmann F: The sensitivity and specificity of pulmonary carbon dioxide elimination for noninvasive assessment of fluid responsiveness. *Anesth Analg* 2016; 122:1404–11
8. Broca B De, Garnier J, Fischer M-O, Archange T, Marc J, Abou-Arab O, Dupont H, Lorne E, Guinot P: Stroke volume changes induced by a recruitment maneuver predict fluid responsiveness in patients with protective ventilation in the operating theater: *Medicine (Baltimore)* 2016; 95:e4259
9. Lijmer JG, Mol BW, Heisterkamp S, Bossel GJ, Prins MH, van der Meulen JH, Bossuyt PM: Empirical evidence of design-related bias in studies of diagnostic tests. *JAMA* 1999; 282:1061–6

(Accepted for publication July 7, 2017.)

### In Reply:

We thank Dr. Jacquet-Lagrèze *et al.* for their interest in our recent article<sup>1</sup> and are happy to respond to their comments.

We fully agree with Dr. Jacquet-Lagrèze *et al.* on the pivotal value of Standards for Reporting Diagnostic Accuracy Studies<sup>2</sup> to improve the quality of diagnostic accuracy studies. As clearly mentioned in the article, inclusions were conducted over a 1-yr period among nonconsecutive patients, and only 28 patients were included. As stated in the Discussion section, we therefore cannot exclude the possibility of selection bias.

We respectfully fully disagree with Dr. Jacquet-Lagrèze *et al.* when they claimed that the studies cited in the article do not support the rationale to define responders to volume expansion as an increase of stroke volume of 10% or more. We invite the authors to read these recommendations<sup>3,4</sup> carefully and many other publications on the subject.<sup>5</sup>

The least significant change has not been yet evaluated for proAQT system (Pulsion Medical Systems, Feldkirchen, Germany). However, the algorithm for pulse contour analysis of the proAQT system is the same as that of the PiCCO system (Pulsion Medical Systems). The main difference between these two devices lies in cardiac output calibration (*i.e.*, transpulmonary thermodilution for the PiCCO and specific algorithm without external method for the proAQT system). Previous studies demonstrated that the proAQT pulse contour analysis algorithm was able to detect changes in cardiac output as small as 5.0% during an end-expiratory occlusion test,<sup>6</sup> 10.0% during a passive leg raising test,<sup>7</sup> 9.5% during a respiratory cycle,<sup>8</sup> and, even more recently, 6.0% during a mini-fluid challenge.<sup>9</sup> Although we fully concur with the authors that additional research is warranted, our data remain nevertheless in line with most recent literature.

Finally, we apologize to the authors for having omitted some significant contributions. However, most of them were unavailable at the time of the submission process without, from our point of view, providing added value (postoperative setting, positive end expiratory pressure elevation in septic patients, mean arterial pressure monitoring, pulmonary elimination of carbon dioxide, *etc.*).

### Competing Interests

Dr. Biaï received honoraria from Edwards Lifesciences (Irvine, California) and Pulsion Medical Systems (Feldkirchen, Germany) as a lecturer. Dr. Futier received honoraria from Dräger AG (Lübeck, Germany), GE Healthcare (Little Chalfont, United Kingdom), and Fresenius Kabi (Bad Homburg vor der Höhe, Germany) as a lecturer and travel reimbursement by Fisher & Paykel Healthcare (Auckland, New Zealand). The other authors declare no competing interests.

**Matthieu Biaï, M.D., Ph.D., Emmanuel Futier, M.D., Ph.D., Bruno Pereira, Ph.D., Karine Nouette-Gaulain, M.D., Ph.D.** Bordeaux University Hospital, Bordeaux, France (M.B.). matthieu.biais@chu-bordeaux.fr

## References

1. Biais M, Lanchon R, Sesay M, Le Gall L, Pereira B, Futier E, Nouette-Gaulain K: Changes in stroke volume induced by lung recruitment maneuver predict fluid responsiveness in mechanically ventilated patients in the operating room. *ANESTHESIOLOGY* 2017; 126:260–7
2. Bossuyt PM, Reitsma JB, Bruns DE, Gatsonis CA, Glasziou PP, Irwig L, Lijmer JG, Moher D, Rennie D, de Vet HC, Kressel HY, Rifai N, Golub RM, Altman DG, Hooft L, Korevaar DA, Cohen JF; STARD Group: STARD 2015: An updated list of essential items for reporting diagnostic accuracy studies. *BMJ* 2015; 351:h5527
3. National Institute for Health and Clinical Excellence. CardioQ-ODM Oesophageal Doppler Monitor. Available at: <https://www.nice.org.uk/guidance/mtg3>. Accessed May 5, 2014.
4. Vallet B, Blanloeil Y, Cholley B, Orliaguet G, Pierre S, Tavernier B; Société Française d'Anesthésie et de Réanimation: Guidelines for perioperative haemodynamic optimization. *Ann Fr Anesth Reanim* 2013; 32:e151–8
5. Pearse RM, Harrison DA, MacDonald N, Gillies MA, Blunt M, Ackland G, Grocott MP, Ahern A, Griggs K, Scott R, Hinds C, Rowan K; OPTIMISE Study Group: Effect of a perioperative, cardiac output-guided hemodynamic therapy algorithm on outcomes following major gastrointestinal surgery: A randomized clinical trial and systematic review. *JAMA* 2014; 311:2181–90
6. Monnet X, Osman D, Ridet C, Lamia B, Richard C, Teboul JL: Predicting volume responsiveness by using the end-expiratory occlusion in mechanically ventilated intensive care unit patients. *Crit Care Med* 2009; 37:951–6
7. Jabot J, Teboul JL, Richard C, Monnet X: Passive leg raising for predicting fluid responsiveness: Importance of the postural change. *Intensive Care Med* 2009; 35:85–90
8. Berkenstadt H, Margalit N, Hadani M, Friedman Z, Segal E, Villa Y, Perel A: Stroke volume variation as a predictor of fluid responsiveness in patients undergoing brain surgery. *Anesth Analg* 2001; 92:984–9
9. Biais M, de Courson H, Lanchon R, Pereira B, Bardonneau G, Griton M, Sesay M, Nouette-Gaulain K: Mini-fluid challenge of 100 ml of crystalloid predicts fluid responsiveness in the operating room. *ANESTHESIOLOGY* 2017; 127:450–6

(Accepted for publication July 7, 2017.)

## Clarification: Current Status of Neuromuscular Reversal and Monitoring, Challenges and Opportunities

To the Editor:

We are writing to clarify certain statements and information provided in a recent review of neuromuscular reversal and monitoring.<sup>1</sup>

The article stated that, “The GE Healthcare E-NMT-01 module was recalled by the FDA in 2014.” To clarify, GE Healthcare initiated the recall voluntarily, and the announcement appeared on the U.S. Food and Drug Administration Web site. This voluntary recall action entailed technology correction and replacement of all modules in the field. It was completed September 28, 2015. The GE Healthcare NeuroMuscular Transmission (NMT) module is commercially available. Additional information is available on the U.S. Food and Drug Administration Web site.<sup>2</sup>

The article also incorrectly showed that the GE Healthcare M-NMT module has only a kinemyography sensor and that the E-NMT module has only an electromyography sensor. To clarify, both the M-NMT and E-NMT modules had interchangeable electromyography and kinemyography sensors. The M-NMT module is no longer manufactured and was replaced by the currently available E-NMT module. We emphasize the clinical benefits that can be afforded from routine use of objective neuromuscular monitors.<sup>3,4</sup>

## Research Support

Support was provided solely from institutional and/or departmental sources.

## Competing Interests

Ms. Hyman is employed by GE Healthcare (Chicago, Illinois). Dr. Brull is a shareholder and member of the Board of Directors of Sensime AB (Uppsala, Sweden).

**Elise C. Hyman, B.A., Sorin J. Brull, M.D., F.C.A.R.C.S.I.**  
GE Healthcare, Madison, Wisconsin (E.C.H.). [Elise.Hyman@ge.com](mailto:Elise.Hyman@ge.com)

## References

1. Brull SJ, Kopman AF: Current status of neuromuscular reversal and monitoring: Challenges and opportunities. *ANESTHESIOLOGY* 2017; 126:173–90
2. U.S. Food and Drug Administration: Class 2 device recall NeuroMuscular Transmission Module, ENMT. Available at: <https://www.accessdata.fda.gov/scripts/cdrh/cfdocs/cfres/res.cfm?id=125850>. Accessed April 24, 2017
3. Todd MM, Hindman BJ, King BJ: The implementation of quantitative electromyographic neuromuscular monitoring in an academic anesthesia department. *Anesth Analg* 2014; 119:323–31
4. Todd MM, Hindman BJ: The implementation of quantitative electromyographic neuromuscular monitoring in an academic anesthesia department: Follow-up observations. *Anesth Analg* 2015; 121:836–8

(Accepted for publication June 22, 2017.)
